# Supplementary material for: A Glycosyl Hydrolase 5 Family Protein Is Essential for Virulence of Necrotrophic Fungi and Can Suppress Plant Immunity
Source: MDPI journal article supplement (doi:10.3390/ijms25052693), 2024-02-26
Supplement: s1 [file s1]

**a**

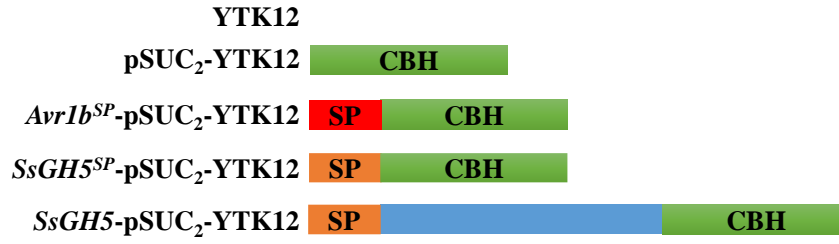

**b**

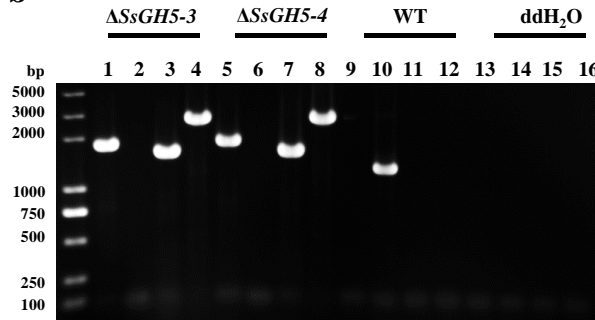

**c**

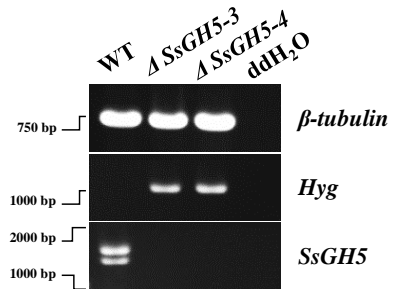

**d**

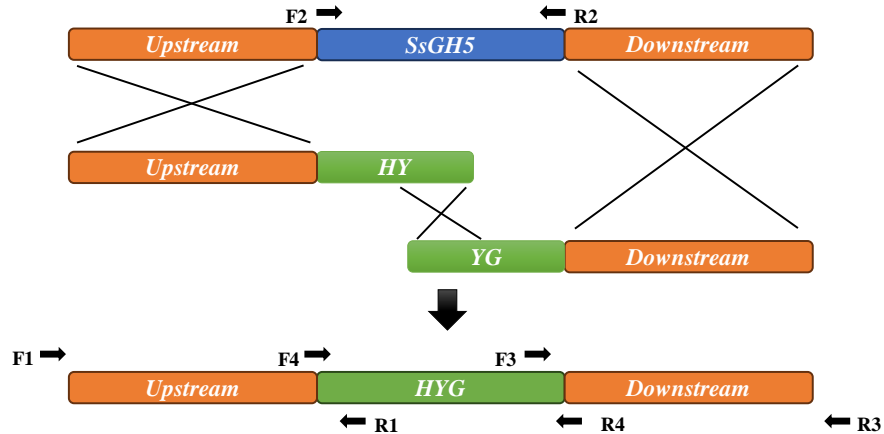

**Figure S1.** Generation and analysis of  $\Delta SsGH5$  mutants. **a** The signal peptide of effector *Avr1b*, *SsGH5* and the full-length amino acid sequence of *SsGH5* were constructed to the pSUC2 vector, respectively, and subsequently transferred into the yeast strain of YTK12 and used to test for secretion. **b** PCR validation of knockout and complementary strains. The full length of the *HptII* fragment was amplified with primer F4/R4 (lane: 4, 8, 12, 16); upstream of the *trpC* promoter overlapping with *SsGH5* was amplified with primer F1/R1. (lane: 1, 5, 9, 13); *trpC* terminator

overlapping with *SsGH5* downstream, amplified with primer F3/R3 (lane: 3, 7, 11, 15); *SsGH5* full length amplified with primer F2/R2 (lane: 2, 6, 10, 14). Lane M, DL5000 marker. **c** Detection of mRNA expression levels of  $\Delta$ *SsGH5* mutants and complementary mutants by reverse transcription PCR. **d** Schematic representation of targeted gene recombination substitutions, with different colors shown indicate *HptII* cassette (green), *SsGH5* (blue) and flanking sequences (orange). The scheme is not drawn to scale.

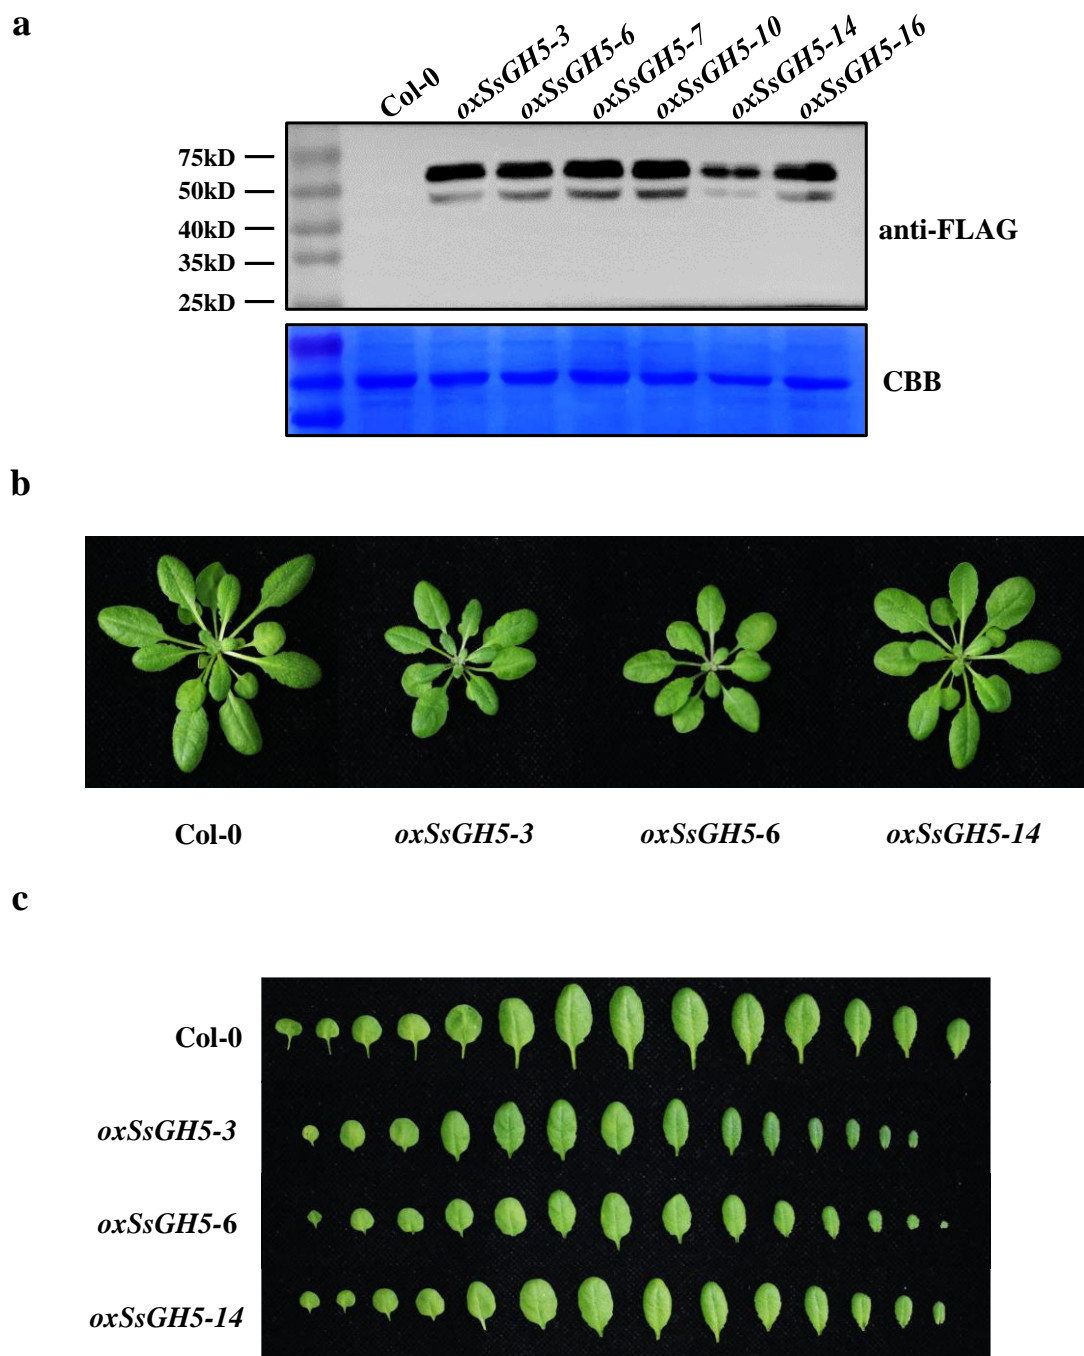

**Figure S2.** Confirmation of *SsGH5* transgenic plants. **a** Western blot detection of *SsGH5* expression in transgenic *Arabidopsis* lines. Anti-FLAG M2 mAb was used for western blotting and stained with CBB as a loading control. **b**, **c** Morphological characteristics of *SsGH5* transgenic *Arabidopsis* lines.

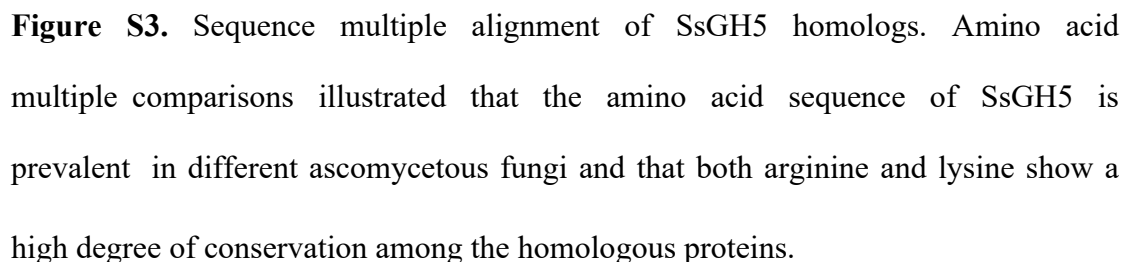

**Figure S3.** Sequence multiple alignment of SsGH5 homologs. Amino acid multiple comparisons illustrated that the amino acid sequence of SsGH5 is prevalent in different ascomycetous fungi and that both arginine and lysine show a high degree of conservation among the homologous proteins.

**Supplementary Table S1.** List of primers used in the study

| Primer name                  | Sequence 5'-3'                         | Purpose                                |
|------------------------------|----------------------------------------|----------------------------------------|
| GH5-SalI-F (P1)              | GTCGAC GCGACGTATTCATCAGACATGACT        | SsGH5 5' flanking sequence             |
| GH5-SalI-R (P2)              | GTCGAC TCTGGAGATATTTGGCCAAACCT         | SsGH5 5' flanking sequence             |
| GH5-XbaI-F (P3)              | TCTAGA GGAGGTGCAATTTTGCGCT             | SsGH5 3' flanking sequence             |
| GH5-XbaI-R (P4)              | TCTAGA CATGCAGATAGAAGCTGACTCACG        | SsGH5 3' flanking sequence             |
| YG-F                         | GATGTAGGAGGGCGTGGATATGTCCT             | Hyg Split 3' construct                 |
| HY-R                         | GTATTGACCGATTCTTTCGGTCCGAA             | Hyg Split 5' construct                 |
| GH5UYZ-F (F1)                | TTGACTCATGGGAGGTGCACG                  | SsGH5 5'upstream validation            |
| GH5UYZ-R (R1)                | CCTCGTTCCTGTCTGCTAATAAGAGTCAC          | SsGH5 5'upstream validation            |
| YZ-GH5-F (F2)                | GGTATCAGTTGCGCTTATCACGTCC              | SsGH5 PCR                              |
| YZ-GH5-R (R2)                | AACGGCCTTTGCGTTCATAGCAG                | SsGH5 PCR                              |
| GH5DYZ-F (F3)                | CTACGAGACTGAGGAATCCGCTCTT              | SsGH5 3'downstream validation          |
| GH5DYZ-R (R3)                | GAAGCTGACTCACGCCGACGA                  | SsGH5 3'downstream validation          |
| YZ-HYG-F (F4)                | AGAAGATGATATTGAAGGAGCACT               | HYG PCR                                |
| YZ-HYG-R (R4)                | AAGAAGGATTACCTCTAAACAAGTGT             | HYG PCR                                |
| SsGH5-EcoRI-F                | GAATTC ATGAAGGTATCAGTTGCGCTTA          | Yeast secretion trap system            |
| SsGH5 <sup>SP</sup> -EcoRI-R | GAATTC ACCTTGCTCTCCACACTGTGA           | Yeast secretion trap system            |
| SsGH5-EcoRI-R                | GAATTC TGGAACGGCCTTTGCG                | Yeast secretion trap system            |
| SsGH5-F (recombination)      | agaaggectactagt ATGAAGGTATCAGTTGCGCTTA | Subcellular localization               |
| SsGH5-R (recombination)      | gacggatccactagt TGGAACGGCCTTTGCG       | Subcellular localization               |
| SsGH5-F (recombination)      | cctactagtggatcc ATGAAGGTATCAGTTGCGCTTA | Transgenic <i>Arabidopsis thaliana</i> |
| SsGH5-R (recombination)      | accgtcgacggatcc TGGAACGGCCTTTGCG       | Transgenic <i>Arabidopsis thaliana</i> |
| SsTub-F                      | ATAACTTCGTTTTTCGGTCAATCCG              | RT-PCR                                 |
| SsTub-R                      | ATAACTTCGTTTTTCGGTCAATCCG              | RT-PCR                                 |
| HYGcds-F                     | ATGAAAAAGCCTGAATCACC GCGA              | RT-PCR                                 |
| HYGcds-R                     | CTATTCCTTTGCCCTCGGACGAGTG              | RT-PCR                                 |
| SsGH5-F                      | ATGAAGGTATCAGTTGCGCTTA                 | RT-PCR                                 |
| SsGH5-R                      | TGGAACGGCCTTTGCG                       | RT-PCR                                 |
| SsTub-qF                     | CTGTATCGACAACGAGGCTCTCT                | RT-qPCR                                |
| SsTub-qR                     | GAGTTAAGTTGACCAGGGAACG                 | RT-qPCR                                |
| SsGH5-qF                     | CGAGTCTGGGGCTTCAATGAC                  | RT-qPCR                                |
| SsGH5-qR                     | GATGAGACTGATTCCGTGAGC                  | RT-qPCR                                |
| SsTub-F                      | ACCTCCATCCAAGA ACTC                    | Biomass determination                  |
| SsTub-R                      | GAACTCCATCTCGTCCAT                     |                                        |
| AtUBQ5-F                     | ACACCAAGCCGAAGAAGA                     | Biomass determination                  |
| AtUBQ5-R                     | TCCACAGGTTGCGTTAGG                     |                                        |
| BnActin-F                    | ATTGGTGTTGGGGTTGGG                     | Biomass determination                  |
| BnActin-R                    | TGGCTGTTTTGCGTATTCAT                   |                                        |
| BcActin-F                    | CTTCGTGTAGCACCAGAGGAG                  | Biomass determination                  |
| BcActin-R                    | GAGAGGACGGCTTGAATAGAGA                 |                                        |
